# Supplementary material for: A poly(N,N-dimethylaminoethyl methacrylate-co-ethylene glycol dimethacrylate) monolith for direct solid-phase extraction of benzodiazepines from undiluted human urine
Source: Royal Society of Chemistry journal article supplement (doi:10.1039/d0ay01025a), 2020-01-01
Supplement: d0ay01025a1.pdf [file d0ay01025a1.pdf]

**Table S1** Optimum conditions for extraction of BZDs using the proposed method

| Condition                                    | Optimum value       |
|----------------------------------------------|---------------------|
| pH                                           | Without adjustment  |
| Dilution ratio (urine/H <sub>2</sub> O, v/v) | 1/0 (totally 4 mL)  |
| Washing solvent                              | NH <sub>4</sub> OAc |
| Eluting solvent                              | ACN                 |
| Eluting volume                               | 3 mL                |

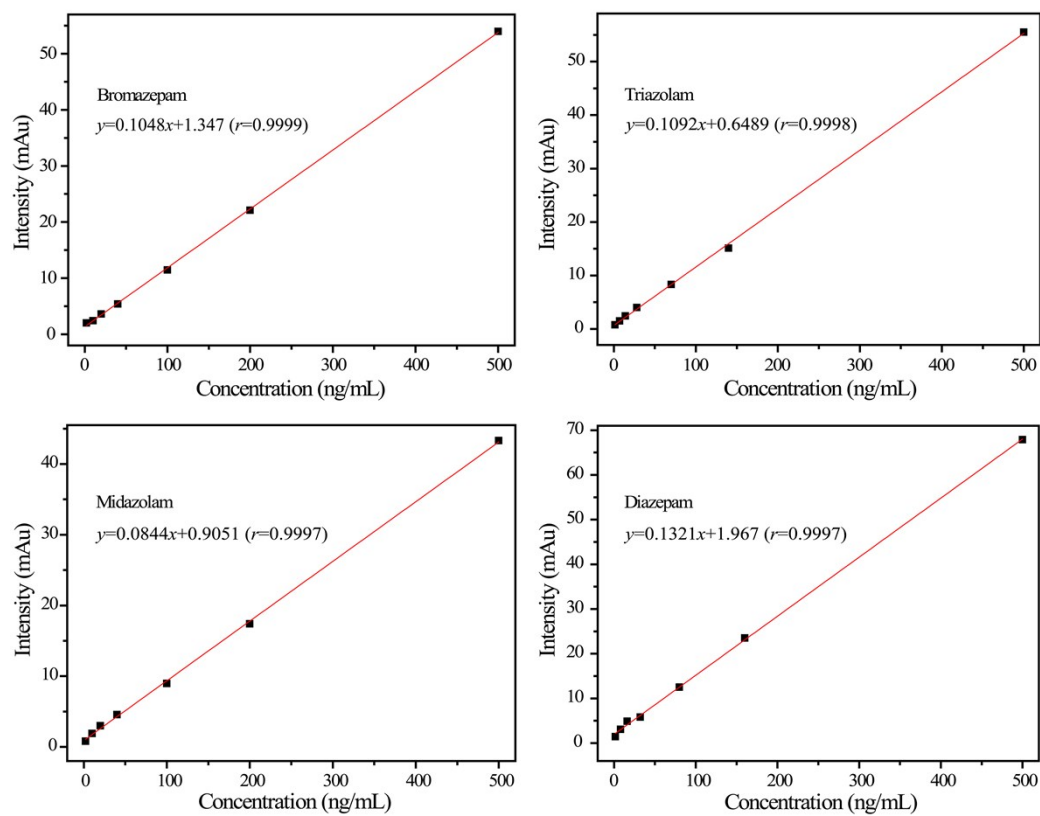

**Fig.S1** The linear curves of four BZDs
